# Supplementary material
Source: PubMed Central journal article supplement (PMC4261114)
Supplement: 97320630010693S1.pdf [file 97320630010693S1.pdf]

## Supplementary material:

**Table 1:** severity of allergic reaction in both case and control groups

|                     | Allergy          | Case | Control | p-value |
|---------------------|------------------|------|---------|---------|
| <b>Cow Milk</b>     | Without reaction | 12   | 52      | 0.00*   |
|                     | mild             | 36   | 18      | 0.00**  |
|                     | Moderate & Sever | 24   | 2       |         |
|                     | Total            | 72   | 72      |         |
| <b>Cow Milk UHT</b> | Without reaction | 20   | 62      |         |
|                     | mild             | 36   | 10      | 0.00*   |
|                     | Moderate         | 16   | 0       | 0.00**  |
|                     | Total            | 72   | 72      |         |
| <b>Casein</b>       | Without reaction | 28   | 60      |         |
|                     | mild             | 36   | 12      | 0.00*   |
|                     | Moderate         | 8    | 0       | 0.00**  |
|                     | Total            | 72   | 72      |         |

\*: Chi square Method, \*\*: Monte Carlo Method
